# Supplementary material
Source: PubMed Central journal article supplement (PMC7507829)
Supplement: NIHMS1625879-supplement-Materials_List.pdf [file NIHMS1625879-supplement-Materials_List.pdf]

Materials List for:

# In Vivo Assessment of Alveolar Macrophage Efferocytosis Following Ozone Exposure

Myles X. Hodge<sup>1</sup>, Sky W. Reece<sup>1</sup>, Jennifer H. Madenspacher<sup>2</sup>, Kymberly M. Gowdy<sup>1</sup>

<sup>1</sup>Department of Pharmacology and Toxicology, East Carolina University

<sup>2</sup>Research Triangle Park, National Institute of Environmental Health and Sciences

Correspondence to: Kymberly M. Gowdy at [gowdyk14@ecu.edu](mailto:gowdyk14@ecu.edu)

URL: <https://www.jove.com/video/60109>

DOI: [doi:10.3791/60109](https://doi.org/10.3791/60109)

## Materials

| Name                                            | Company       | Catalog Number | Comments                                                                                                                                                                                                                                                                              |
|-------------------------------------------------|---------------|----------------|---------------------------------------------------------------------------------------------------------------------------------------------------------------------------------------------------------------------------------------------------------------------------------------|
| Annexin V-FITC Kit                              | Trevigen      | 4830-250-K     | The TACS Annexin V-FITC Kit allows rapid, specific, and quantitative identification of apoptosis in individual cells when using flow cytometry.                                                                                                                                       |
| BCL2 Jurkat T Cells                             | ATCC          | ATCC CRL-2899  | The BCL2 Jurkat cell line was derived by transfecting human Jurkat T cells with the pSFFV-neo mammalian expression vector containing the human BCL-2 ORF insert and a neomycin-resistant gene. Has been for models of measuring efferocytosis.                                        |
| Countess II Automated Cell Counter              | Thermofisher  | AMQAX1000      | It is a benchtop assay platform equipped with state-of-the-art optics, full autofocus, and image analysis software for rapid assessment of cells in suspension. Very easy to use.                                                                                                     |
| Cytospin 4 Cyto centrifuge                      | Thermofisher  | A78300003      | Provides economical thin-layer preparations from any liquid matrix, especially hypocoellular fluids such as bronchoalveolar lavage fluid.                                                                                                                                             |
| Fetal Bovine Serum, qualified, heat inactivated | Thermofisher  | 16140071       | Provides Nutrients to cultured cells for them to grow. It is standard for cell culture.                                                                                                                                                                                               |
| Kwik-Diff Reagent 2, Eosin                      | Thermofisher  | 9990706        | Eosin staining that stains cytoplasm.                                                                                                                                                                                                                                                 |
| Kwik-Diff Reagent 1, Fixative                   | Thermofisher  | 9990705        | Fixes cells to be stained by H&E.                                                                                                                                                                                                                                                     |
| Kwik-Diff Reagent 3, Methylene Blue             | Thermofisher  | 9990707        | Methylene Blue staining that stains the nucleus.                                                                                                                                                                                                                                      |
| Penicillin-Streptomycin                         | Sigma/Aldrich | P0781-100ML    | Penicillin-Streptomycin is the most commonly used antibiotic solution for culture of mammalian cells. Additionally it is used to maintain sterile conditions during cell culture.                                                                                                     |
| RPMI 1640 Medium, GlutaMAX Supplement           | Thermofisher  | 61870036       | RPMI 1640 Medium (Roswell Park Memorial Institute 1640 Medium) was originally developed to culture human leukemic cells in suspension and as a monolayer. RPMI 1640 medium has since been found suitable for a variety of mammalian cells, including HeLa, Jurkat, MCF-7, PC12, PBMC, |

|                                                |                      |       |                                                                                                                                                               |
|------------------------------------------------|----------------------|-------|---------------------------------------------------------------------------------------------------------------------------------------------------------------|
|                                                |                      |       | astrocytes, and carcinomas. Helps grow Jurkat T cells fast and efficiently.                                                                                   |
| Stratagene UV Stratalinker 1800 UV Crosslinker | Cambridge Scientific | 16659 | The Stratalinker UV crosslinker is designed to induce apoptosis, crosslink DNA or RNA to nylon, nitrocellulose, or nylon-reinforced nitrocellulose membranes. |
| Teledyne T400 ultraviolet light photometer     | Teledyne API         | T400  | The Model T400 UV Absorption analyzer uses a system based on the Beer-Lambert law for measuring low ranges of ozone in ambient air.                           |
| Teledyne T703 Ozone calibrator                 | Teledyne API         | T703  | Provides feedback control of the UV lamp intensity, assuring stable ozone output.                                                                             |
